# Supplementary material for: Sharps injuries and splash exposures among healthcare workers in Arab countries: protocol of a systematic review and meta-analysis
Source: HighWire-hosted journal article supplement (doi:10.1136/bmjopen-2021-052993), 2021-10-01
Supplement: bmjopen-2021-052993supp001_data_supplement.pdf [file bmjopen-2021-052993supp001_data_supplement.pdf]

**Supplementary file 1****Reporting checklist for protocol of a systematic review and meta-analysis**

|                           | Reporting Item                                                                                                                                                                                                     | Page Number |
|---------------------------|--------------------------------------------------------------------------------------------------------------------------------------------------------------------------------------------------------------------|-------------|
| <b>Title</b>              |                                                                                                                                                                                                                    |             |
| Identification            | <a href="#">#1a</a> Identify the report as a protocol of a systematic review                                                                                                                                       | 1           |
| Update                    | <a href="#">#1b</a> If the protocol is for an update of a previous systematic review, identify as such                                                                                                             | N/A         |
| <b>Registration</b>       |                                                                                                                                                                                                                    |             |
|                           | <a href="#">#2</a> If registered, provide the name of the registry (such as PROSPERO) and registration number                                                                                                      | 2           |
| <b>Authors</b>            |                                                                                                                                                                                                                    |             |
| Contact                   | <a href="#">#3a</a> Provide name, institutional affiliation, e-mail address of all protocol authors; provide physical mailing address of corresponding author                                                      | 1           |
| Contribution              | <a href="#">#3b</a> Describe contributions of protocol authors and identify the guarantor of the review                                                                                                            | 11          |
| <b>Amendments</b>         |                                                                                                                                                                                                                    |             |
|                           | <a href="#">#4</a> If the protocol represents an amendment of a previously completed or published protocol, identify as such and list changes; otherwise, state plan for documenting important protocol amendments | N/A         |
| <b>Support</b>            |                                                                                                                                                                                                                    |             |
| Sources                   | <a href="#">#5a</a> Indicate sources of financial or other support for the review                                                                                                                                  | N/A         |
| Sponsor                   | <a href="#">#5b</a> Provide name for the review funder and / or sponsor                                                                                                                                            | N/A         |
| Role of sponsor or funder | <a href="#">#5c</a> Describe roles of funder(s), sponsor(s), and / or institution(s), if any, in developing the protocol                                                                                           | N/A         |
| <b>Introduction</b>       |                                                                                                                                                                                                                    |             |
| Rationale                 | <a href="#">#6</a> Describe the rationale for the review in the context of what is already known                                                                                                                   | 5           |
| Objectives                | <a href="#">#7</a> Provide an explicit statement of the question(s) the review will address with reference to participants, interventions, comparators, and outcomes (PICO)                                        | 5,6         |
