# Supplementary material for: Sharps injuries and splash exposures among healthcare workers in Arab countries: protocol of a systematic review and meta-analysis
Source: HighWire-hosted journal article supplement (doi:10.1136/bmjopen-2021-052993), 2021-10-01
Supplement: bmjopen-2021-052993supp002_data_supplement.pdf [file bmjopen-2021-052993supp002_data_supplement.pdf]

## Supplementary file 2

### Pre-search in PubMed

**Source:** PubMed (NLM)

**Search date:** 2021-03-11

**Search specifications:** All search terms are searched in the search fields: "title" and "abstract" (here marked with TI/AB) and in MeSH (when available). No filters or limitations applied.

**Result:** 309 records

### Search string

((("Middle East"[Mesh:NoExp] OR "Bahrain"[Mesh] OR "Iraq"[Mesh] OR "Jordan"[Mesh] OR "Kuwait"[Mesh] OR "Lebanon"[Mesh] OR "Oman"[Mesh] OR "Qatar"[Mesh] OR "Saudi Arabia"[Mesh] OR "Syria"[Mesh] OR "United Arab Emirates"[Mesh] OR "Yemen"[Mesh] OR "Arab World"[Mesh] OR "Africa, Northern"[Mesh] OR "Somalia"[Mesh] OR "Djibouti"[Mesh] OR "Comoros"[Mesh] OR "Sudan"[Mesh] OR "Mauritania"[Mesh] OR "Middle East\*" [Title/Abstract] OR "Near East" [Title/Abstract] OR "East Mediterranean" [Title/Abstract] OR "Eastern Mediterranean" [Title/Abstract] OR Arabic [Title/Abstract] OR Arabs [Title/Abstract] OR Arab [Title/Abstract] OR MENA [Title/Abstract] OR "Arabian Peninsula" [Title/Abstract] OR "North Africa" [Title/Abstract] OR "Northern Africa" [Title/Abstract] OR Maghreb [Title/Abstract] OR Maghrib [Title/Abstract] OR Egypt\* [Title/Abstract] OR Jordan\* [Title/Abstract] OR Lebanon [Title/Abstract] OR Lebanese [Title/Abstract] OR Syria\* [Title/Abstract] OR Algeri\* [Title/Abstract] OR Libya\* [Title/Abstract] OR Morocco\* [Title/Abstract] OR Tunis\* [Title/Abstract] OR UAE [Title/Abstract] OR "United Arab Emirates" [Title/Abstract] OR Saudi\* [Title/Abstract] OR KSA [Title/Abstract] OR Qatar\* [Title/Abstract] OR Oman\* [Title/Abstract] OR Emirati\* [Title/Abstract] OR Yemen\* [Title/Abstract] OR Kuwait\* [Title/Abstract] OR Bahrain\* [Title/Abstract] OR Somail\* [Title/Abstract] OR Djibouti\* [Title/Abstract] OR Comoro\* [Title/Abstract] OR Comorian\* [Title/Abstract] OR Iraq\* [Title/Abstract] OR Palestin\* [Title/Abstract] OR "West Bank" [Title/Abstract] OR "Gaza Strip" [Title/Abstract] OR
